# Supplementary material
Source: HighWire-hosted journal article supplement (https://erj.ersjournals.com/content/55/6/2000606)
Supplement: inline-supplementary-material-1 [file inline-supplementary-material-1.pdf]

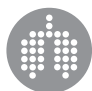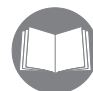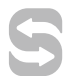

SHAREABLE PDF

## Subtle signs – red flags

Jürgen Behr<sup>1</sup> and Marius M. Hoeper <sup>2</sup>

**Affiliations:** <sup>1</sup>Dept of Internal Medicine V, Ludwig-Maximilians-University of Munich (LMU) and German Centre of Lung Research, Munich, Germany. <sup>2</sup>Dept of Respiratory Medicine, Hannover Medical School and German Centre of Lung Research (DZL), Hannover, Germany.

**Correspondence:** Jürgen Behr, University of Munich, Campus Grosshadern, Dept of Internal Medicine V, Comprehensive Pneumology Center, Member of the German Center for Lung Research, Marchioninstr. 15, 81377 Munich, Germany. E-mail: juergen.behr@med.uni-muenchen.de

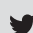

@ERSpublications

**Even the presence of mild chronic lung disease in patients with pulmonary hypertension is associated with worse response to targeted therapy and survival when compared to IPAH** <http://bit.ly/2IS7rpT>

**Cite this article as:** Behr J, Hoeper MM. Subtle signs – red flags. *Eur Respir J* 2020; 55: 2000606 [<https://doi.org/10.1183/13993003.00606-2020>].

This single-page version can be shared freely online.

Pulmonary hypertension (PH) in the context of chronic lung disease (*i.e.* group 3 PH) is an ongoing and unresolved challenge. Looking specifically into precapillary PH, it is evident that its presence in chronic lung disease is associated with increased dyspnoea, reduced exercise tolerance, worsened oxygenation, low diffusion capacity of the lung for carbon monoxide ( $D_{LCO}$ ) and dismal prognosis. Notably, pulmonary vascular disease is known to negatively impact clinical outcomes in chronic lung disease, even though the definition of precapillary PH may not yet be fulfilled [1]. *Vice versa*, the presence of mild or subclinical chronic lung disease may impact the course, prognosis and treatment response of patients with precapillary PH. Historically, clinical treatment trials for targeted medications in pulmonary arterial hypertension (PAH) allowed enrolment of patients with some (mild) degree of chronic lung disease, be it COPD, emphysema or interstitial lung disease. The outcome of this specific subpopulation, however, has never been focussed on. Consequently, we are lacking evidence in this subpopulation regarding the clinical disease behaviour and response to therapy.
